# Supplementary material for: Labrid cleaner fishes show kinematic convergence as juveniles despite variation in morphology
Source: Oxford University Press journal article supplement (doi:10.1242/jeb.153783), 2017-01-01
Supplement: jeb153783supp.pdf [file jeb153783supp.pdf]

| Species                           | BOA<br>(°) | GAPE<br>(mm) | PMX<br>(mm) | LJA<br>(°) | HX<br>(mm) | CR<br>(°) | TTPG<br>(ms) | TTPMX<br>(ms) | TTPH<br>(ms) | TTCR<br>(ms) | TTJR<br>(ms) |
|-----------------------------------|------------|--------------|-------------|------------|------------|-----------|--------------|---------------|--------------|--------------|--------------|
| <i>Bodianus bimaculatus</i>       | 86.61      | 0.97         | 0.60        | 27.13      | 0.21       | 6.67      | 14.05        | 17.15         | 19.31        | 19.51        | 37.18        |
| <i>Bodianus rufus</i>             | 76.51      | 1.03         | 1.30        | 20.43      | 0.19       | 4.23      | 14.08        | 16.13         | 18.32        | 18.35        | 33.51        |
| <i>Choerodon fasciatus</i>        | 72.51      | 2.93         | 2.11        | 34.3       | 0.28       | 4.73      | 16.21        | 19.89         | 24.82        | 27.48        | 60.51        |
| <i>Coris gaimard</i>              | 70.63      | 1.97         | 1.73        | 29.64      | 0.23       | 5.64      | 13.43        | 15.16         | 22.75        | 21.15        | 57.05        |
| <i>Diproctacanthus xanthurus</i>  | 75.15      | 1.21         | 0.64        | 12.98      | 0.23       | 3.46      | 11.86        | 12.01         | 13.72        | 16.21        | 31.51        |
| <i>Halichoeres bivittatus</i>     | 77.66      | 1.48         | 1.11        | 18.98      | 0.25       | 4.08      | 12.53        | 15.15         | 17.77        | 19.15        | 34.62        |
| <i>Halichoeres cyanocephalus</i>  | 72.82      | 1.52         | 0.92        | 16.48      | 0.22       | 4.42      | 12.15        | 15.08         | 17.37        | 16.51        | 36.51        |
| <i>Halichoeres garmoti</i>        | 77.98      | 2.04         | 1.04        | 31.09      | 0.19       | 3.83      | 14.41        | 14.89         | 20.55        | 23.05        | 46.15        |
| <i>Hemigymnus melapterus</i>      | 66.99      | 2.67         | 1.43        | 31.65      | 0.19       | 5.21      | 14.10        | 16.09         | 22.29        | 23.51        | 48.88        |
| <i>Labroides dimidiatus</i>       | 58.29      | 1.26         | 0.67        | 13.02      | 0.16       | 2.26      | 10.27        | 11.28         | 15.00        | 15.00        | 30.27        |
| <i>Labroides pectoralis</i>       | 60.15      | 1.30         | 0.62        | 12.98      | 0.17       | 3.01      | 11.15        | 11.95         | 14.70        | 15.68        | 31.05        |
| <i>Larabicus quadrilineatus</i>   | 64.14      | 1.41         | 0.38        | 11.69      | 0.26       | 3.49      | 11.17        | 11.00         | 16.20        | 16.10        | 32.28        |
| <i>Pseudojuloides cerasinus</i>   | 86.15      | 1.56         | 1.35        | 33.20      | 0.22       | 5.46      | 14.86        | 18.15         | 22.02        | 20.61        | 48.15        |
| <i>Pseudocheilinus evanidus</i>   | 86.43      | 1.46         | 1.83        | 27.56      | 0.25       | 4.91      | 15.16        | 17.16         | 20.64        | 22.13        | 39.84        |
| <i>Pseudocheilinus hexataenia</i> | 75.15      | 1.33         | 0.93        | 22.10      | 0.18       | 3.70      | 13.64        | 14.65         | 16.63        | 16.15        | 33.08        |
| <i>Thalassoma duperrey</i>        | 75.15      | 3.06         | 2.22        | 28.94      | 0.24       | 4.88      | 15.15        | 20.15         | 27.72        | 28.08        | 56.54        |
| <i>Thalassoma hardwicke</i>       | 88.51      | 3.92         | 2.72        | 35.07      | 0.28       | 7.56      | 16.68        | 24.98         | 23.67        | 26.08        | 63.51        |
| <i>Thalassoma janssenii</i>       | 70.55      | 4.38         | 2.55        | 33.49      | 0.22       | 5.67      | 16.54        | 23.54         | 23.25        | 25.51        | 60.15        |
| <i>Thalassoma lutescens</i>       | 70.02      | 3.11         | 2.22        | 25.88      | 0.25       | 4.56      | 14.78        | 21.76         | 25.48        | 25.54        | 55.90        |

**Table S1 – Species’ mean data.** Mean values for kinematic and morphological variables for each species. Abbreviations: SL, standard length; MCA, area of the maxillary crest of the premaxilla; BOA, body orientation angle; GAPE, peak gape; PMX, peak premaxillary protrusion; LJA, peak lower jaw angle; HX, hyoid excursion distance; CR, peak cranial rotation; TTPG, time to peak gape; TTPMX, time to peak premaxillary protrusion; TTPH, time to peak hyoid excursion; TTCR, time to peak cranial rotation; TTJR, time to jaw retraction

| Species                           | SL (mm) | MCA (units <sup>2</sup> ) |
|-----------------------------------|---------|---------------------------|
| <i>Bodianus bimaculatus</i>       | 38.44   | 836                       |
| <i>Bodianus rufus</i>             | 40.98   | 851                       |
| <i>Choerodon fasciatus</i>        | 63.70   | 1538                      |
| <i>Coris gaimard</i>              | 54.38   | 884                       |
| <i>Diproctacanthus xanthurus</i>  | 48.08   | 202                       |
| <i>Halichoeres bivittatus</i>     | 48.62   | 1070                      |
| <i>Halichoeres cyanocephalus</i>  | 48.51   | 1277                      |
| <i>Halichoeres garnoti</i>        | 64.06   | 628                       |
| <i>Hemigymnus melapterus</i>      | 43.25   | 838                       |
| <i>Labroides dimidiatus</i>       | 50.73   | 107                       |
| <i>Labroides pectoralis</i>       | 51.39   | 182                       |
| <i>Larabicus quadrilineatus</i>   | 42.86   | 181                       |
| <i>Pseudojuloides cerasinus</i>   | 64.91   | 1135                      |
| <i>Pseudocheilinus evanidus</i>   | 44.57   | 891                       |
| <i>Pseudocheilinus hexataenia</i> | 39.06   | 510                       |
| <i>Thalassoma duperrey</i>        | 84.04   | 1392                      |
| <i>Thalassoma hardwicke</i>       | 77.70   | 1590                      |
| <i>Thalassoma janseni</i>         | 76.47   | 1782                      |
| <i>Thalassoma lutescens</i>       | 73.93   | 1460                      |

Table S1 (contd.)

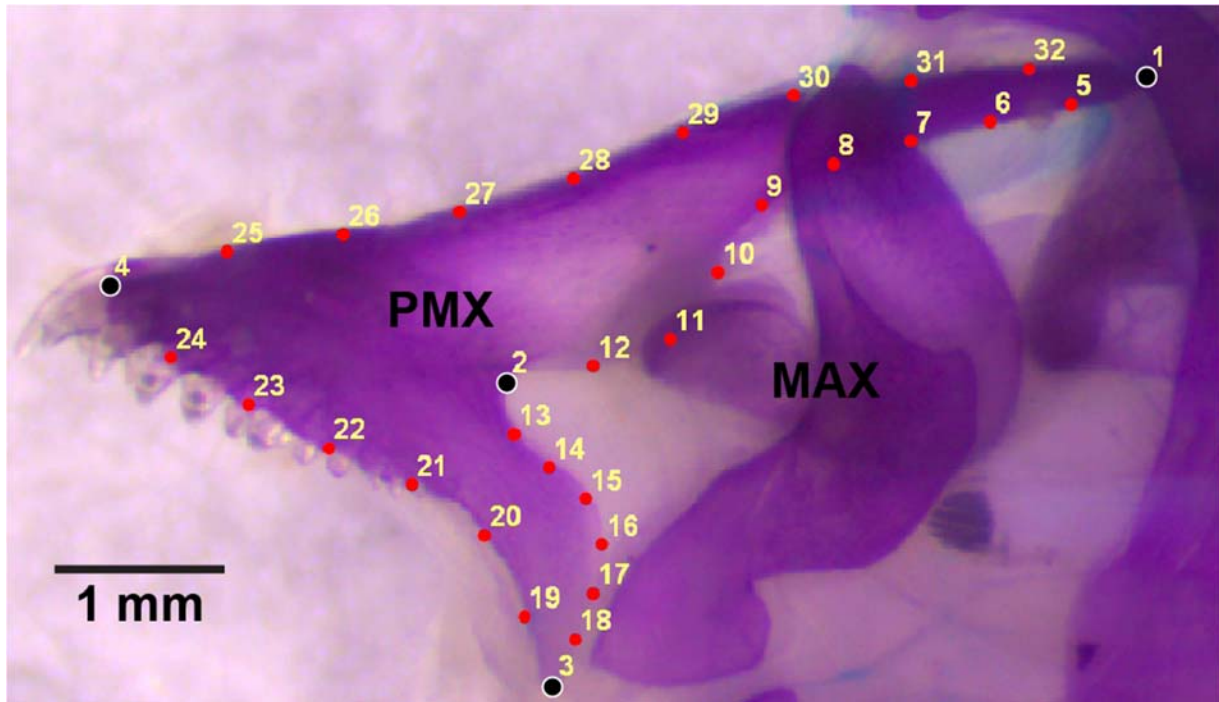

**Fig. S1 – Digitization of premaxillary shape.** Lateral images of the premaxilla of each specimen were imported into the program tpsDig2 (Rohlf 2006) for the placement of landmarks and semi-landmarks. Four landmarks (black) were placed on lateral photographs of each specimen, labeled as 1-4 in the figure. The landmarks were: (1) the distal end of the ascending process, (2) the intersection of the ascending and alveolar processes, (3) the distal end of the alveolar process, and (4) the root of the anteriormost caniniform tooth. Twenty-eight additional semi-landmarks (red) distributed across 4 separate curves were placed along the outline of the bone (numbered 5-32 in the figure). Not shown are curves along which semi-landmarks could slide.

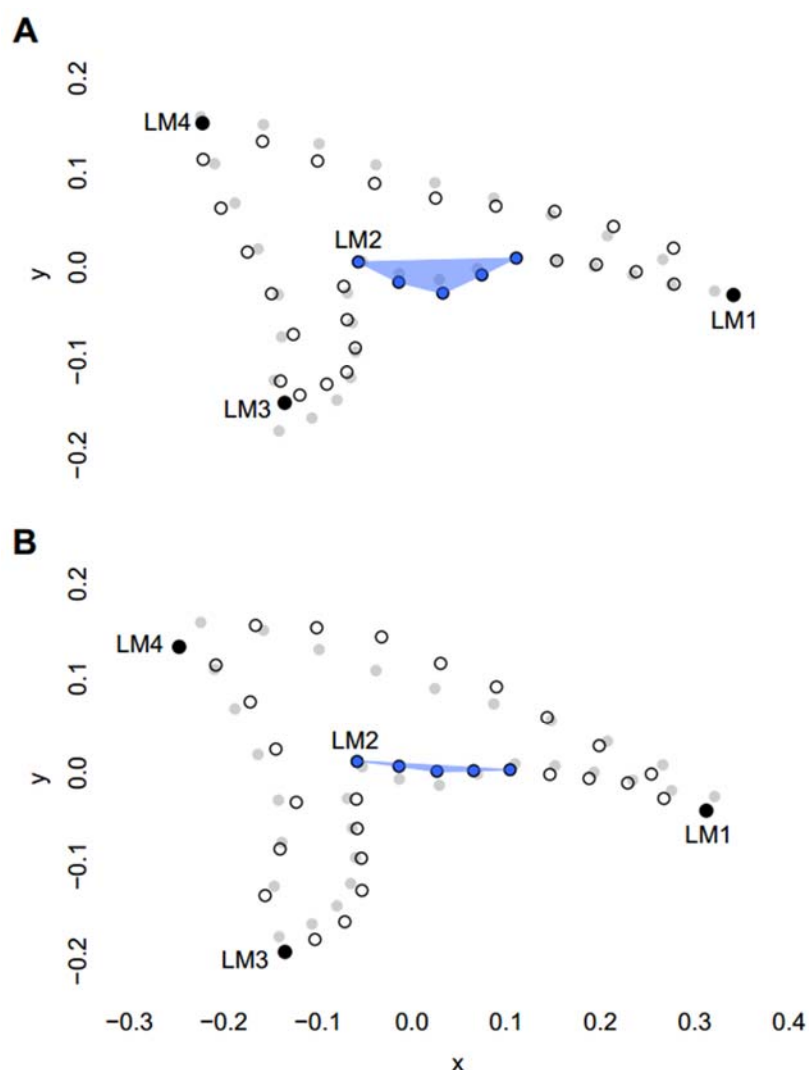

**Fig. S2 – Measurement of the area of the maxillary crest.** After species' mean premaxillary landmark sets were Procrustes superimposed, coordinate data were imported into the program ImageJ. The area of the maxillary crest on the premaxilla was captured by the points in blue: landmark 2 (LM2) and the next four semi-landmarks along the ventral edge of the ascending process. The area of the polygon contained within these five points was taken as a close approximation of the area of the maxillary crest. Shown above are mean landmarks for A) *Thalassoma hardwicke* and B) *Larabicus quadrilineatus*. Black, filled circles correspond to landmarks (except LM2), while open circles represent semi-landmarks (except those that capture the crest). Grey filled circles in the background of each panel show the mean shape across all species.

| (Size-Corrected) Kinematic Variable  | Model        | $\Delta$ AICc | Slope (s.e.)       | Intercept (s.e.)     | Additional Parameters |
|--------------------------------------|--------------|---------------|--------------------|----------------------|-----------------------|
| Time to Peak Premaxillary Protrusion | OLS          | 0             | 0.0041<br>(0.0008) | -4.6946<br>(0.8627)  | -                     |
|                                      | PGLS – BM    | 8.00          | 0.0044<br>(0.0011) | -4.2969<br>(1.9430)  | $\gamma = 1.00$       |
|                                      | PGLS – Pagel | 1.58          | 0.0041<br>(0.0009) | -4.1632<br>(1.0871)  | $\lambda = 0.46$      |
|                                      | PGLS – OU    | 1.67          | 0.0041<br>(0.0008) | -4.6904<br>(0.8613)  | $\alpha = 0.46$       |
| Peak Premaxillary Protrusion         | OLS          | 0             | 0.0011<br>(0.0002) | -1.0441<br>(0.1613)  | -                     |
|                                      | PGLS – BM    | 5.33          | 0.0006<br>(0.0002) | -0.6037<br>(0.3375)  | $\gamma = 1.00$       |
|                                      | PGLS – Pagel | 0             | 0.0011<br>(0.0002) | -1.0441<br>(0.1613)  | $\lambda = 0.00$      |
|                                      | PGLS – OU    | 1.81          | 0.0010<br>(0.0001) | -0.9352<br>(0.1730)  | $\alpha = 0.09$       |
| Time to Jaw Retraction               | OLS          | 0             | 0.0085<br>(0.0027) | -10.4579<br>(2.8581) | -                     |
|                                      | PGLS – BM    | 3.47          | 0.0044<br>(0.0034) | -4.3672<br>(5.7082)  | $\gamma = 1.00$       |
|                                      | PGLS – Pagel | 0             | 0.0085<br>(0.0027) | -10.4579<br>(2.8581) | $\lambda = 0.00$      |
|                                      | PGLS – OU    | 1.70          | 0.0080<br>(0.0032) | -8.7515<br>(3.3363)  | $\alpha = 0.09$       |

**Table S2 – Comparisons of linear models fit to kinematic variables against maxillary crest area.** The kinematic variable listed in the first column was used as the dependent variable in separate regressions against maxillary crest area (see Figure 7 for scatter plots). Four linear models were fit to each bivariate set: ordinary least squares and three phylogenetic generalized least squares (PGLS) models. All PGLS models were informed by the MCC phylogeny. Models were compared using AICc scores. Abbreviations: OLS – ordinary least-squares; PGLS – phylogenetic generalized least squares; BM – Brownian motion; OU – Ornstein-Uhlenbeck

| (Size-Corrected) Kinematic Variable         | Mean Difference | F-Ratio       | p-value                              | Corrected p-value                    |
|---------------------------------------------|-----------------|---------------|--------------------------------------|--------------------------------------|
| Body Orientation Angle                      | -7.980          | 2.123         | 0.128<br>(0.115-0.176)               | 0.128<br>(0.115-0.176)               |
| <b>Peak Cranial Rotation</b>                | <b>-1.711</b>   | <b>9.021</b>  | <b>0.004</b><br><b>(0.003-0.009)</b> | <b>0.009</b><br><b>(0.008-0.014)</b> |
| <b>Peak Lower Jaw Angle</b>                 | <b>-13.112</b>  | <b>21.969</b> | <b>0.001</b><br><b>(0.001-0.001)</b> | <b>0.005</b><br><b>(0.005-0.005)</b> |
| Peak Gape Distance                          | -0.695          | 2.826         | 0.084<br>(0.078-0.108)               | 0.095<br>(0.089-0.119)               |
| <b>Peak Premaxillary Protrusion</b>         | <b>-0.515</b>   | <b>4.301</b>  | <b>0.043</b><br><b>(0.028-0.050)</b> | <b>0.044</b><br><b>(0.029-0.051)</b> |
| Peak Hyoid Excursion                        | -0.006          | 0.376         | 0.536<br>(0.351-0.616)               | 0.525<br>(0.351-0.616)               |
| <b>Time to Peak Gape</b>                    | <b>-2.082</b>   | <b>10.462</b> | <b>0.003</b><br><b>(0.001-0.007)</b> | <b>0.009</b><br><b>(0.007-0.015)</b> |
| <b>Time to Peak Premaxillary Protrusion</b> | <b>-2.845</b>   | <b>5.409</b>  | <b>0.023</b><br><b>(0.017-0.034)</b> | <b>0.035</b><br><b>(0.029-0.046)</b> |
| <b>Time to Peak Hyoid Excursion</b>         | <b>-2.646</b>   | <b>5.660</b>  | <b>0.017</b><br><b>(0.012-0.021)</b> | <b>0.031</b><br><b>(0.020-0.042)</b> |
| <b>Time to Peak Cranial Rotation</b>        | <b>-3.520</b>   | <b>7.300</b>  | <b>0.009</b><br><b>(0.009-0.015)</b> | <b>0.016</b><br><b>(0.016-0.022)</b> |
| <b>Time to Jaw Retraction</b>               | <b>-10.382</b>  | <b>21.084</b> | <b>0.001</b><br><b>(0.001-0.003)</b> | <b>0.004</b><br><b>(0.004-0.007)</b> |

**Table S3 – Phylogenetic ANOVAs of kinematic data.** Phylogenetic ANOVA was performed for each variable listed in the first column to compare mean data between cleaners and non-cleaners. To account for phylogenetic uncertainty, the MCC phylogeny and 100 additional phylogenies from the posterior distribution of Baliga and Law (2016) were used (separately) to perform analyses. Exploratory analyses revealed each variable to be positively correlated with standard length except for: body orientation angle and maximum cranial rotation. The size-influenced data were thus size-corrected using standard length following Revell (2009). Shown in each cell are results from the ANOVA using the MCC tree with ranges for additional analyses in parentheses (values for Mean Difference and F-Ratios were nearly invariant and are thus not shown). Mean Difference was calculated by subtracting non-cleaner data from cleaner data; negative values thus indicate cleaner fishes possess smaller trait magnitudes on average. In the final column, p-values are corrected using methods from Benjamini and Hochberg (1995) to control the false discovery rate. Bold rows indicate significant differences between cleaners and non-cleaners.

## Supplementary Movies

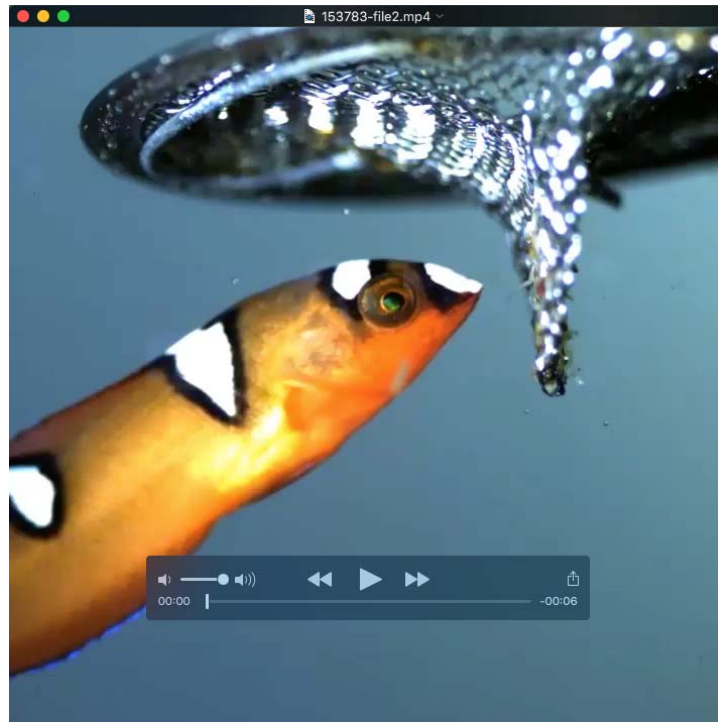

**Movie 1** – *Coris gaimard* feeding on attached invertebrates and exhibiting a ‘premaxillary bite’.

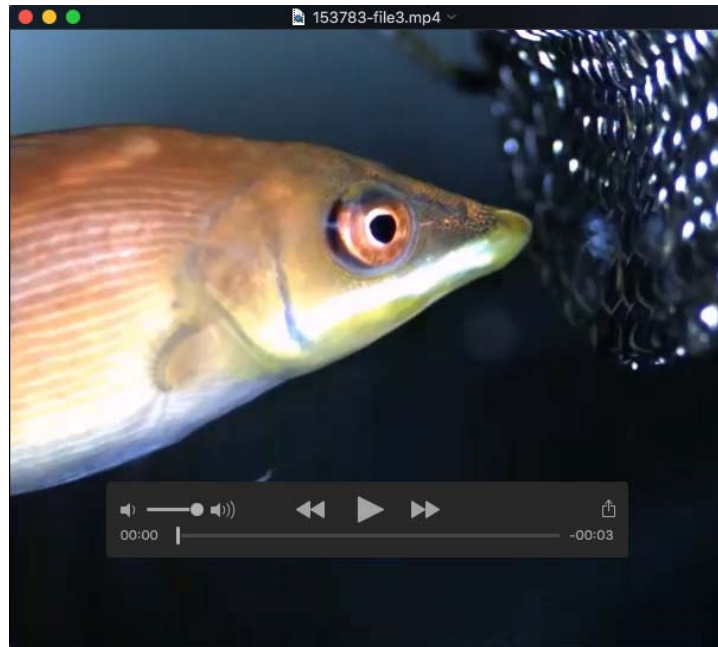

**Movie 2** – *Pseudocheilinus evanidus* feeding on attached invertebrates and exhibiting a ‘premaxillary bite’.



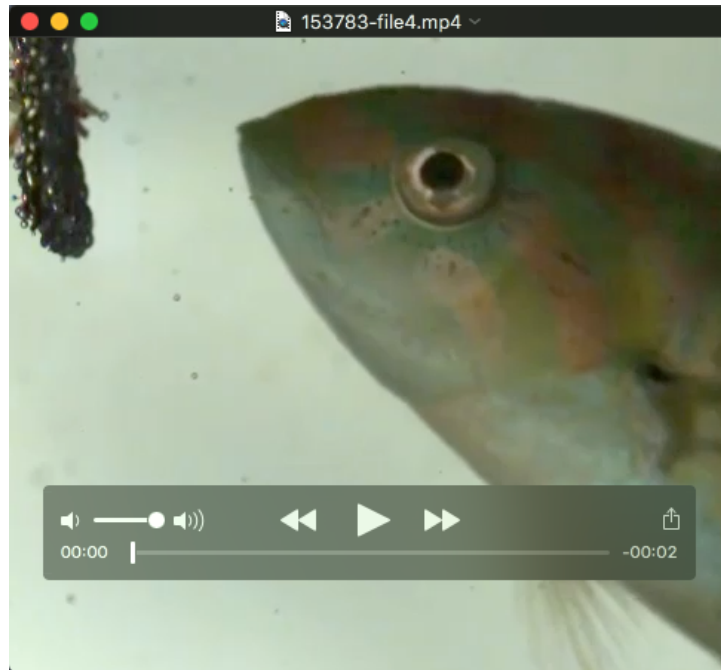

**Movie 3** – *Thalassoma hardwicke* feeding on attached invertebrates and exhibiting a ‘premaxillary bite’.

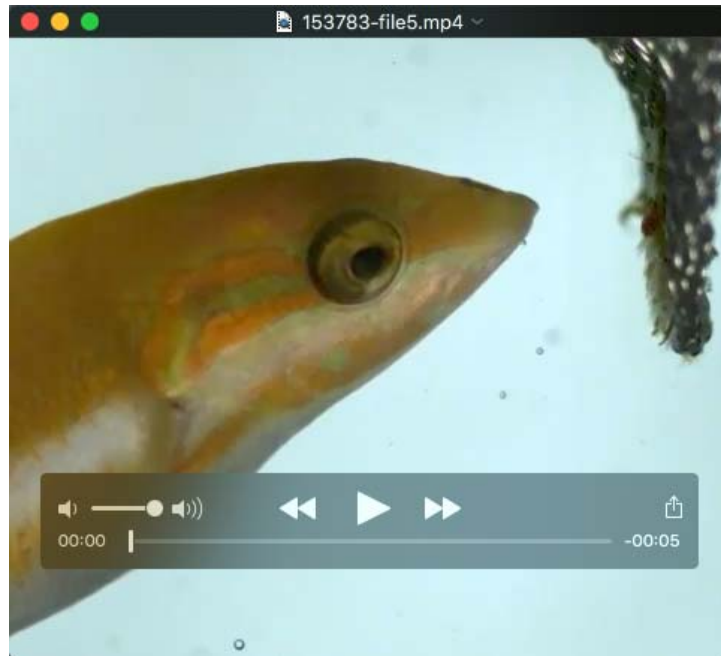

**Movie 4** – *Thalassoma lutescens* feeding on attached invertebrates and exhibiting a ‘premaxillary bite’.

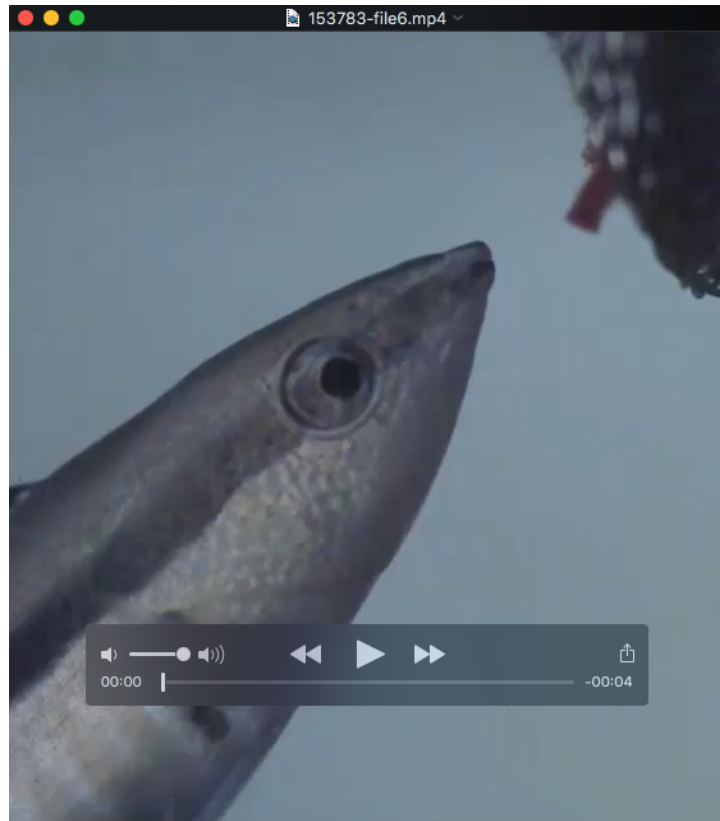

**Movie 5** – *Labroides dimidiatus* feeding on attached invertebrates. No rapid anteroventral decent of the premaxilla is apparent as the bite is delivered.

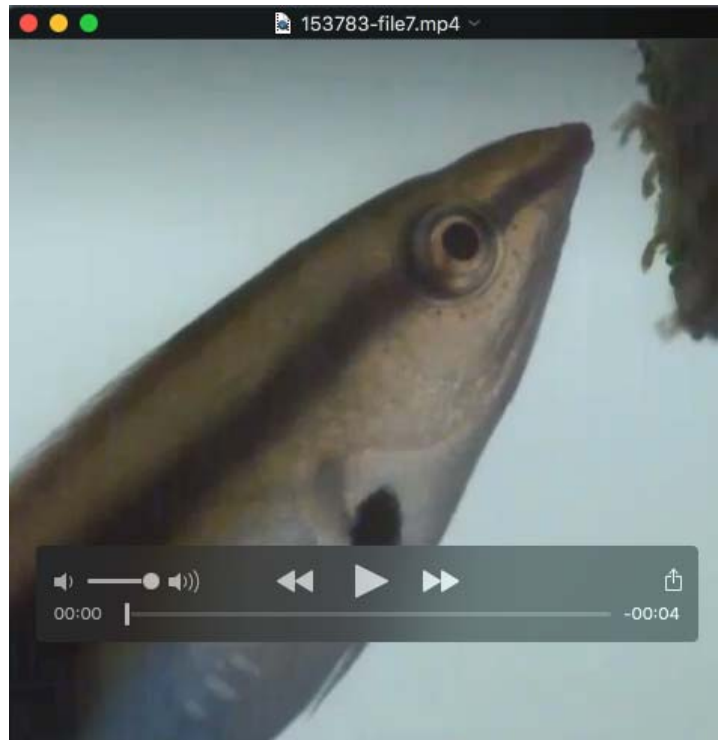

**Movie 6** – *Labroides pectoralis* feeding on attached invertebrates. No rapid anteroventral decent of the premaxilla is apparent as the bite is delivered.
